# Supplementary material
Source: PubMed Central journal article supplement (PMC5802674)

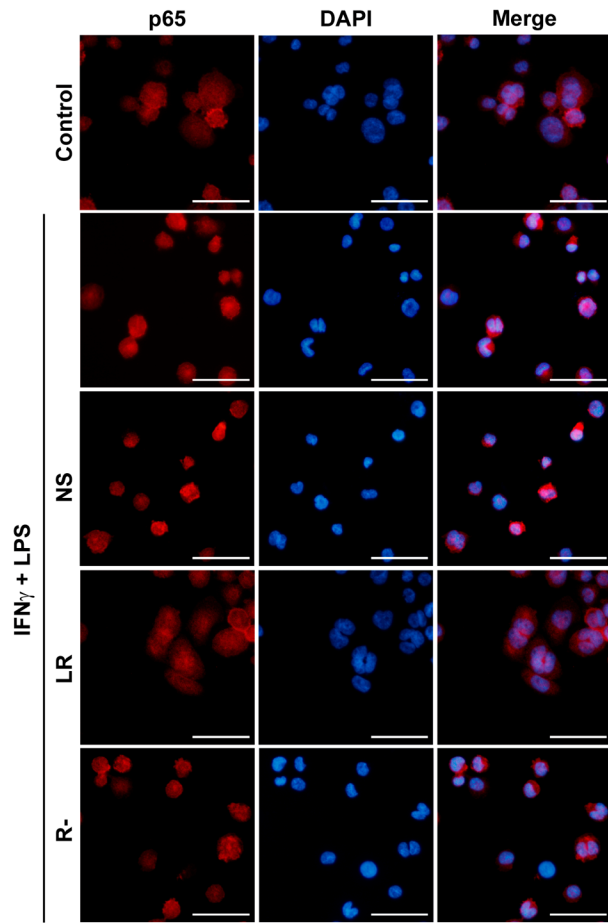

Supplement: Supplementary_fig1.pdf [file Supplementary_fig1.pdf]
